# Supplementary material for: A multi-omic analysis reveals the role of fumarate in regulating the virulence of enterohemorrhagic Escherichia coli
Source: PubMed Central journal article supplement (PMC5841434; doi:10.1038/s41419-018-0423-2), 2018-03-07
Supplement: 41419_2018_423_MOESM1_ESM.pdf [file 41419_2018_423_MOESM1_ESM.pdf]

## Supplemental Information

### Experimental Procedures:

#### Measurement of bacterial growth curve

Bacterial cells were initially cultured in LB broth at 37°C for 16 hours. At the next day, the overnight cultures were adjusted to O.D.<sub>600</sub>=1.2 and inoculated into 5 mL fresh LB broth with 1:500 dilution. The O.D.<sub>600</sub> values for the bacterial growth curve were automatically measured every 30 min using an OD-Monitor C&T (Taitec, Saitama, Japan) as described (1).

#### Construction of EHEC deletion mutants

The isogenic gene deletion mutants were constructed by the Lambda Red-mediated recombination system as described (2, 3). The Lambda Red recombinase expression plasmid pKD46 is a temperature-sensitive plasmid, and the lambda red proteins were induced with 10 mM L-arabinose. This method was performed using primers containing the sequence for 30 bp homology to the target gene and 20 bp to amplify a kanamycin or chloramphenicol resistance gene from pKD4 or pKD3. The primers used in the mutant construction are listed in Table S2. The antibiotic resistance genes were flanked by recombinase FLP recognition target (FRT) sites, and directly repeated FRT sites were used for antibiotic resistance gene removal with pCP20. For generation of the EHEC strain EDL933 deletion mutants, the purified DNA fragments were electroporated into EDL933 harboring pKD46 cells. After electroporation, cells were incubated with 2XYT at 37°C for 1 hour, and plated on an LB agar plate containing kanamycin or chloramphenicol. The plates were incubated at 37°C for antibiotic screening and to induce the loss of pKD46. In order to generate EDL933 multiple gene mutants or prevent the polar effects on upstream and downstream gene expression of target genes, it is necessary to remove the resistance cassette with pCP20. The Flp recombinase expression plasmid pCP20 is also a temperature-sensitive plasmid, and the expression of Flp recombinase is induced at 43°C (2-4). Flp recombinase recognizes the FRT sites and removes the FRT site-flanked antibiotic resistance gene, generating an in-frame deletion mutant. The selected colonies were sensitive to Ampicillin and Kanamycin or chloramphenicol for absence of pCP20 and the resistance gene.

## Figures

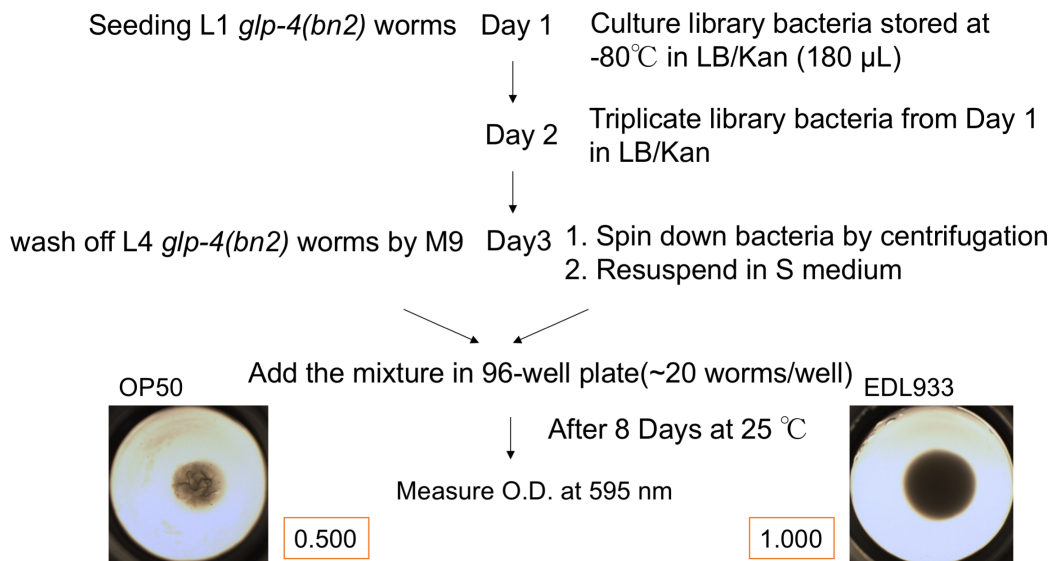

### Figure S1. Screening of the EDL933 transposome mutant library.

*C. elegans glp-4 (bn2)* L1 stage larvae were cultured on the Enriched Nematode Growth (ENG) medium plates at the restrictive temperature (25°C) at Day 1. At the same day, the EDL933 transposome mutant library, stored in 96-well plates and in -80°C freezers, was replicated in LB broth containing 50 µg/mL Kanamycin (Kan) and put in a 37°C incubator for 16 to 18 hours. At Day 2, the entire library was triplicated in 96-well plates containing LB broth with 50 µg/mL Kan and cultured at 37 °C for another 16 to 18 hours. At Day 3, when *C. elegans glp-4 (bn2)* animals reached to L4 larvae/young adult stage, the worms were washed off from ENG plates by M9 buffer and collected. These worms were mixed with each transposon mutant clones in 96-well plated, which was centrifuged and resuspended in S medium. Each well contained approximately 20 worms. Then, the 96-well plates were placed at 25°C with shaking at 70 rpm. After 8 days, the O.D.<sub>595</sub> values of each well were measured. The O.D.<sub>595</sub> value was close to 0.5 when worms were cultured with *E. coli* strain OP50 (as negative control). In contrast, the O.D.<sub>595</sub> value was around 1.0 when the worms were fed with EHEC wild-type EDL933 (as positive control). The hits/candidates with a decreased pathogenic phenotype toward *C. elegans* were selected with the O.D. value that was significantly lower compared to the EHEC wild-type EDL933 positive controls ( $P < 0.05$ ).

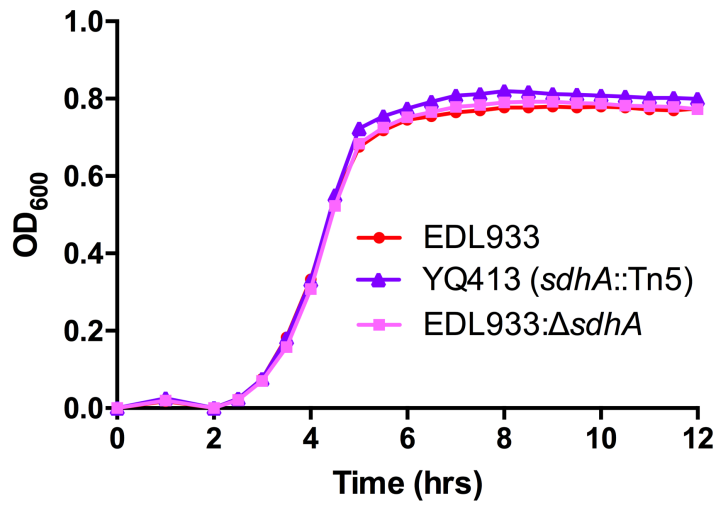

**Figure S2. Growth curves of the EHEC strains.**

The growth curves of the wild-type EHEC strain EDL933 (EDL933), the isogenic *sdhA* transposon mutant [YQ413 (*sdhA*::Tn5)], and the isogenic *sdhA* deletion mutant (EDL933:Δ*sdhA*) were measured.

### Anaerobic metabolism is dispensable for the full virulence of EHEC in *C. elegans*

During anaerobic metabolism, the TCA cycle is repressed and nitrate catalyzed by nitrate reductase (Nar) and fumarate catalyzed by fumarate reductase (Frd) can both act as the alternative terminal electron acceptors other than oxygen (5); or alcohol dehydrogenase, encoded by the *adhE* gene, can regenerate NAD<sup>+</sup> for glycolysis and control fermentation in *E. coli* (6). Moreover, the transcriptional regulator Fnr (fumarate/nitrate reduction regulator) is required for anaerobic respiration and controls the switch from aerobic to anaerobic respiration (7), and the ribonucleotide reductase class III, encoded by *nrdD* and *nrdG*, is essential for a strictly anaerobic environment in *E. coli* (8). To test whether anaerobic metabolism, including anaerobic respiration and fermentation, also plays roles in the pathogenesis of EHEC in *C. elegans*, five isogenic mutants with *narHJI*, *frdA*, *adhE*, *fnr*, and *nrdDG* deletion (EDL933:Δ*narHJI*, EDL933:Δ*frdA*, EDL933:Δ*adhE*, EDL933:Δ*fnr*, and EDL933:Δ*nrdDG*) were generated and tested. We noted that these isogenic mutants were as toxic as the parental wild-type EDL933 (Figure S3). Given the potential redundancy of these genes in controlling anaerobic metabolism, a compound mutant was also generated. Our results showed that the isogenic EDL933:Δ*narHJI*Δ*frdA*Δ*adhE*Δ*fnr*Δ*nrdDG* mutant strain was as toxic as the wild-type EDL933 (Figure S3). Together, our current data suggested that anaerobic metabolism is dispensable for the full virulence of EHEC in *C. elegans*.

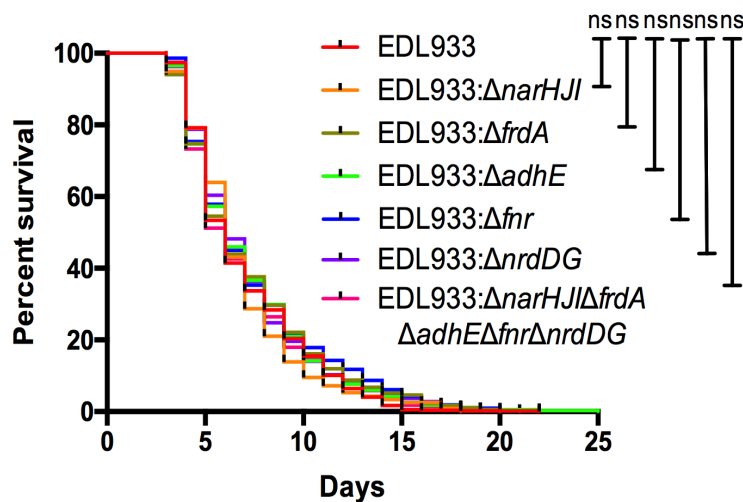

**Figure S3. Deletion of genes involved in anaerobic metabolism did not alter EHEC toxicity in *C. elegans*.**

The survival of N2 worms fed with the wild-type EDL933 (EDL933) and the isogenic deletion strains of *narHJI* (EDL933: $\Delta narHJI$ ), *frdA* (EDL933: $\Delta frdA$ ), *adhE* (EDL933: $\Delta adhE$ ), *fnr* (EDL933: $\Delta fnr$ ), and *nrdDG* (EDL933: $\Delta nrdDG$ ) were examined. Deletion of *narHJI* (median N2 lifespan =  $6.0 \pm 0.1$  days,  $P=0.205$ ), *frdA* (median N2 lifespan =  $6.7 \pm 0.6$  days,  $P=0.129$ ), *adhE* (median N2 lifespan =  $6.0 \pm 0.1$  days,  $P=0.413$ ), *fnr* (median N2 lifespan =  $6.0 \pm 0.1$  days,  $P=0.448$ ), and *nrdDG* (median N2 lifespan =  $6.5 \pm 0.7$  days,  $P=0.908$ ) were as toxic as the parental wild-type EDL933 (median N2 lifespan =  $6.2 \pm 0.5$  days). “ns” represents no statistically significant difference examined by the Log-rank test.

## The effect of fumarate is specific to EHEC

The survival curves of *C. elegans* animals did not change when fed on the succinate or fumarate treated OP50 (Figure S4A). These results suggested that the effect of fumarate was on EDL933: $\Delta sdhA$  mutant directly. We also generated the isogenic *sdhA* mutant strain of *E. coli* OP50 (OP50: $\Delta sdhA$ ) to examine whether the effect of fumarate is specific to EHEC. Our results showed that the survival curves of *C. elegans* animals fed on the wild-type OP50 and the OP50: $\Delta sdhA$  mutant were similar (Figure S4B). Moreover, the survival curves of *C. elegans* animals fed on succinate or fumarate treated OP50: $\Delta sdhA$  were similar to the untreated control, which suggested that the *sdhA* gene is specifically required for the pathogenesis of EHEC in *C. elegans*.

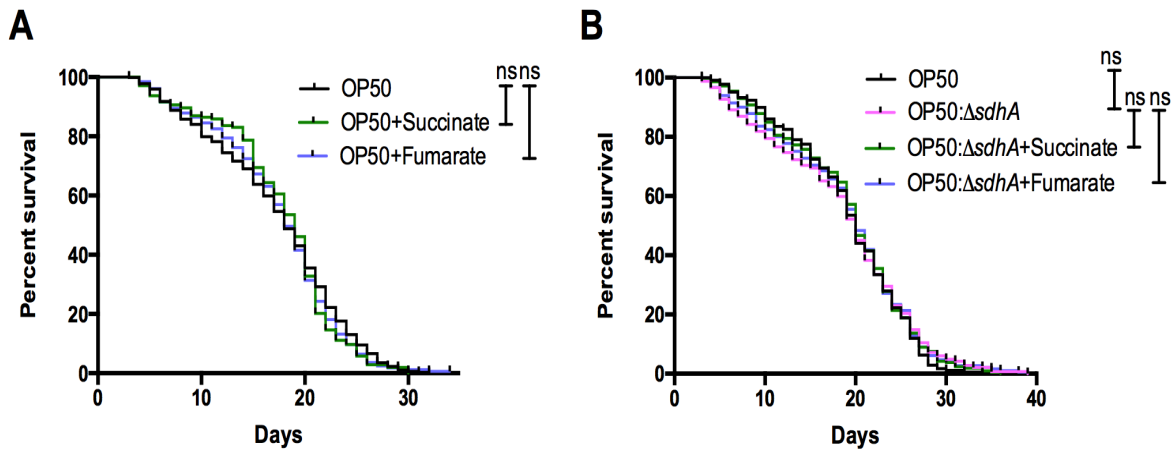

**Figure S4. Supplement of *E. coli* OP50 and OP50: $\Delta sdhA$  with succinate or fumarate did not alter *C. elegans* lifespan.**

(A) The survival curves of worms fed with the wild-type OP50 strain cultured with 2.5 mM succinate (OP50+Succinate) or fumarate (OP50+Fumarate) were examined. Animals on OP50 treated with succinate (OP50+Succinate, N2 median lifespan =  $18.5 \pm 1.5$  days,  $P=0.72$ ) or fumarate (OP50+Fumarate, N2 median lifespan =  $17.8 \pm 0.49$  days,  $P=0.40$ ) shown a similar lifespan compared to that on OP50 (OP50, N2 median lifespan =  $18.67 \pm 0.42$  days). (B) The survival curves of worms fed with the wild-type OP50 strain, and OP50 with isogenic deletion strain of *sdhA* (OP50: $\Delta sdhA$ ) cultured with 2.5 mM succinate (OP50: $\Delta sdhA$ +Succinate) or fumarate (OP50: $\Delta sdhA$ +Fumarate) were examined. Worms on the OP50: $\Delta sdhA$  strain (OP50: $\Delta sdhA$ , N2 median lifespan =  $20.0 \pm 1.4$  days,  $P=0.627$ ) exhibited similar lifespan compared to the wild-type OP50

strain (OP50, N2 median lifespan =  $20.5 \pm 0.7$  days) toward *C. elegans* animals. Worms on succinate-treated OP50: $\Delta$ *sdhA* strain (OP50: $\Delta$ *sdhA*+Succinate, N2 median lifespan =  $20.0 \pm 0.1$  days,  $P=0.842$ ) and fumarate-treated OP50: $\Delta$ *sdhA* strain (OP50: $\Delta$ *sdhA*+Fumarate, N2 median lifespan =  $20.5 \pm 0.7$  days,  $P=0.878$ ) all exhibited similar lifespan compared to the untreated control (OP50: $\Delta$ *sdhA*, N2 median lifespan =  $20.0 \pm 1.4$  days). “ns” represents no statistically significant difference examined by the Log-rank test.

### **The three putative C4-dicarboxylates sensor-regulator systems are dispensable**

The *dcuSR* operon (also known as *yjdHG*) encodes a two-component sensor-regulator system (DcuS-DcuR) which can sense fumarate and lead to activation of the fumarate-succinate antiporter DcuB expression in *E. coli* (9, 10). If fumarate restores *sdhA* mutant toxicity/virulence through the DcuSR two-component system, deletion of *dcuSR* in the *sdhA* mutant background cannot restore its toxicity after supplement of fumarate. We therefore generated the *sdhA**dcuSR* isogenic mutant and examined its toxicity to *C. elegans* under fumarate supplement. As shown in Figure S5A, the toxicity of *sdhA**dcuSR* mutant to *C. elegans* was significantly attenuated compared with wild-type EHEC ( $P < 0.0001$ ) but was similar to the *sdhA* single mutant ( $P = 0.151$ ). Moreover, addition of 2.5 mM fumarate not only restored the toxicity of *sdhA* mutant but also the *sdhA**dcuSR* mutant which suggested that the *dcuSR* two-component system is not involved in sensing fumarate to regulate the virulence of EHEC.

Another DctS-DctR two-component system, which encoded by *dctS* and *dctR* genes, is required for high-affinity C4-dicarboxylate transport in *Rhodobacter capsulatus* (9, 11). We blasted the amino acid sequence of DctS and DctR to the EDL933 amino acid sequence and identified YhiF (Z4909, *yhiF*) as a close homolog of DctR, but could not identify any homolog of DctS. The DctB-DctD sensor-regulator controls the expression of the *dctA* gene encoding C4-dicarboxylate transporter DctA in *Rhizobia* (11). We also blasted the amino acid sequence of DctB and DctD to EDL933 protein sequence and identified HyfR (Z3751, *hyfR*) as having the closest homology to DctD. However, we could not identify any DctB homolog in EDL933. Therefore, we generated the isogenic mutant of *dctR* (*yhiF*) and *dctD* (*hyfR*) in the *sdhA* mutant background to examine whether fumarate regulates EDL933 virulence through SdhA via these two-component systems. As shown in Figure S5B, *dctRsdhA* double mutant is less toxic to *C. elegans* compared with wild-type EHEC ( $P < 0.0001$ ) but is similar to the *sdhA* single mutant ( $P = 0.96$ ). Supplement of 2.5 mM fumarate to the *dctRsdhA* double mutant restored its toxicity to that of the *sdhA* single mutant ( $P = 0.57$ ), suggesting that the DctS-DctR two-component sensing pathway is not required for fumarate to regulate EHEC toxicity.

We also generated *dctD* isogenic mutant in the *sdhA* mutant background and examined its toxicity toward *C. elegans* when supplied with 2.5 mM fumarate. In the same manner as the *dctRsdhA* double mutant, addition of fumarate to the *dctDsdhA* double mutant rescued its toxicity to that of the *sdhA* single mutant ( $P = 0.86$ ) (Figure S5C).



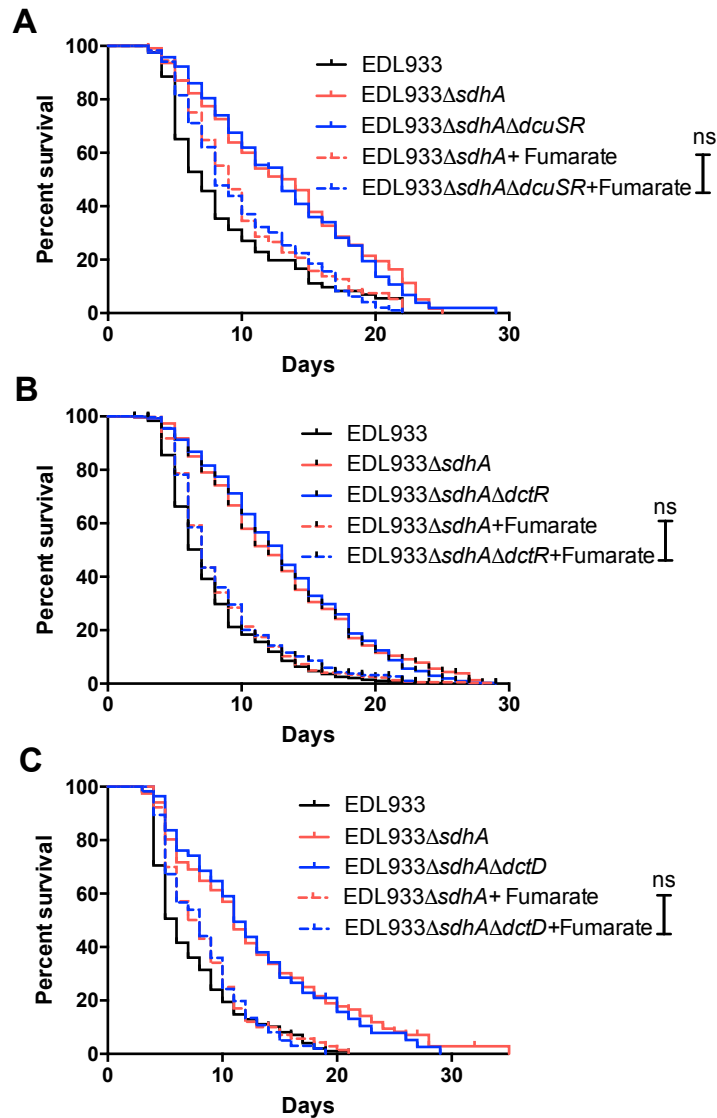

**Figure S5. Deletion of the putative two-component systems in C4 dicarboxylates regulation did not affect the capability of fumarate to restore the toxicity of the EHEC *sdhA* mutant.**

(A) The survival of N2 worms fed with the wild-type strain (EDL933) and the isogenic deletion strains of *sdhA* (EDL933: $\Delta$ *sdhA*), the *sdhA* and *dcuSR* triple mutant (EDL933: $\Delta$ *sdhA* $\Delta$ *dcuSR*) and mutants treated with 2.5mM fumarate, respectively (EDL933: $\Delta$ *sdhA*+Fumarate and EDL933: $\Delta$ *sdhA* $\Delta$ *dcuSR*+Fumarate), were examined. The virulence of *sdhA* and *dcuSR* triple mutant treat with 2.5mM fumarate (EDL933: $\Delta$ *sdhA* $\Delta$ *dcuSR*+Fumarate, median N2 lifespan = 9 days) was similar to *sdhA* mutant treated with 2.5 mM fumarate (EDL933: $\Delta$ *sdhA*+Fumarate, median N2 lifespan = 8 days,  $P=0.52$ ). (B) The survival of N2 worms fed with the wild-type strain (EDL933)

and the isogenic deletion strains of *sdhA* (EDL933: $\Delta$ *sdhA*), the *sdhA* and *dctR* double mutant (EDL933: $\Delta$ *sdhA* $\Delta$ *dctR*) and mutants treated with 2.5mM fumarate, respectively (EDL933: $\Delta$ *sdhA*+Fumarate and EDL933: $\Delta$ *sdhA* $\Delta$ *dctR*+Fumarate) were examined. The virulence of *sdhA* and *dctR* double mutant treated with 2.5 mM fumarate (EDL933: $\Delta$ *sdhA* $\Delta$ *dctR*+Fumarate, median N2 lifespan =  $7.3 \pm 0.6$  days) was similar to *sdhA* mutant treated with 2.5mM fumarate (EDL933: $\Delta$ *sdhA*+Fumarate, median N2 lifespan =  $7.4 \pm 0.5$  days,  $P=0.57$ ). (C) The survival of N2 worms fed with the wild-type strain (EDL933) and the isogenic deletion strains of *sdhA* (EDL933: $\Delta$ *sdhA*), the *sdhA* and *dctD* double mutant (EDL933: $\Delta$ *sdhA* $\Delta$ *dctD*) and mutants treated with 2.5 mM fumarate, respectively (EDL933: $\Delta$ *sdhA*+Fumarate and EDL933: $\Delta$ *sdhA* $\Delta$ *dctD*+Fumarate), were examined. The virulence of *sdhA* and *dctD* double mutant treat with 2.5 mM fumarate (EDL933: $\Delta$ *sdhA* $\Delta$ *dctD*+Fumarate, median N2 lifespan = 8 days) was similar to *sdhA* mutant treated with 2.5 mM fumarate (EDL933: $\Delta$ *sdhA*+Fumarate, median N2 lifespan = 8 days,  $P=0.86$ ). “ns” represents no statistically significant difference examined by the Log-rank test.

## Tables

**Table S1. Nematode strains used in this study.**

| <b>Strain</b> | <b>Relevant characteristics</b>                                                                    | <b>Source or reference</b> |
|---------------|----------------------------------------------------------------------------------------------------|----------------------------|
| N2            | <i>C. elegans</i> wild-type strain                                                                 | (12)                       |
| GK454         | <i>unc-119(ed3), dkl5247[Pact-5::mCherry::HA::act-5, unc119(+)]</i> ;<br>mCherry::ACT-5 expression | (13)                       |

**Table S2. Bacterial strains used in this study.**

| Strain                                                            | Description                                                                                                                                                    | Source or reference |
|-------------------------------------------------------------------|----------------------------------------------------------------------------------------------------------------------------------------------------------------|---------------------|
| OP50                                                              | uracil auxotroph and laboratory food source for <i>C. elegans</i>                                                                                              | (12)                |
| EDL933                                                            | <i>E. coli</i> O157:H7 isolated from raw hamburger meat                                                                                                        | (14)                |
| HER1266                                                           | <i>E. coli</i> O157:H7 isolated from human stool                                                                                                               | (15)                |
| YQ413                                                             | <i>sdhA</i> ::Tn5, Tn5 transposon mutant inserted in the <i>sdhA</i> gene of EDL933                                                                            | this study          |
| EDL933:Δ <i>sdhA</i>                                              | EDL933 isogenic mutant with <i>sdhA</i> gene deleted; Kan <sup>R</sup> kick out                                                                                | this study          |
| EDL933:Δ <i>sdhC</i>                                              | EDL933 isogenic mutant with <i>sdhC</i> gene deleted; Kan <sup>R</sup>                                                                                         | this study          |
| EDL933:Δ <i>sdhD</i>                                              | EDL933 isogenic mutant with <i>sdhD</i> gene deleted; Kan <sup>R</sup>                                                                                         | this study          |
| EDL933:Δ <i>sdhB</i>                                              | EDL933 isogenic mutant with <i>sdhB</i> gene deleted; Kan <sup>R</sup>                                                                                         | this study          |
| EDL933:Δ <i>sdhC</i> Δ <i>sdhD</i><br>Δ <i>sdhA</i> Δ <i>sdhB</i> | EDL933 isogenic mutant with <i>sdhCDAB</i> operon deleted; Kan <sup>R</sup>                                                                                    | this study          |
| EDL933-pQE30                                                      | EDL933 transformed with pQE30; Amp <sup>R</sup>                                                                                                                | (16)                |
| EDL933:Δ <i>sdhA</i> -pQE30                                       | EDL933 isogenic mutant with <i>sdhA</i> gene deleted; Kan <sup>R</sup> kick out, and transformed with pQE30; Amp <sup>R</sup>                                  | this study          |
| EDL933:Δ <i>sdhA</i> -pWF134                                      | EDL933 isogenic mutant with <i>sdhA</i> gene deleted; Kan <sup>R</sup> kick out, and transformed with pWF134; Amp <sup>R</sup>                                 | this study          |
| EDL933:Δ <i>sdhA</i> -pWF134                                      | EDL933 isogenic mutant with <i>sdhA</i> gene deleted; Kan <sup>R</sup> , and complement with <i>sdhCDAB</i> by transformation with pWF134; Amp <sup>R</sup>    | this study          |
| EDL933:Δ <i>sdhCDAB</i> -pWF134                                   | EDL933 isogenic mutant with <i>sdhCDAB</i> gene deleted; Kan <sup>R</sup> , and complement with <i>sdhCDAB</i> by transformation with pWF134; Amp <sup>R</sup> | this study          |
| EDL933 <i>sdhA</i> ::Tn5-pWF134                                   | EDL933 transposon inserted in <i>sdhA</i> gene; Kan <sup>R</sup> , and complemented with <i>sdhCDAB</i> by transformation with pWF134; Amp <sup>R</sup>        | this study          |
| OP50:Δ <i>sdhA</i>                                                | OP50 isogenic mutant with <i>sdhA</i> gene deleted; Kan <sup>R</sup>                                                                                           | this study          |

| Strain                                                                                                             | Description                                                                                                                                                                        | Source or reference |
|--------------------------------------------------------------------------------------------------------------------|------------------------------------------------------------------------------------------------------------------------------------------------------------------------------------|---------------------|
| EDL933: $\Delta$ <i>icdA</i>                                                                                       | EDL933 isogenic mutant with <i>icdA</i> gene deleted; Kan <sup>R</sup>                                                                                                             | this study          |
| EDL933: $\Delta$ <i>sucA</i> $\Delta$ <i>sucB</i>                                                                  | EDL933 isogenic mutant with <i>sucA</i> gene and <i>sucB</i> gene deleted; Kan <sup>R</sup>                                                                                        | this study          |
| EDL933: $\Delta$ <i>sucC</i> $\Delta$ <i>sucD</i>                                                                  | EDL933 isogenic mutant with <i>sucC</i> gene and <i>sucD</i> gene deleted; Kan <sup>R</sup>                                                                                        | this study          |
| EDL933: $\Delta$ <i>frdA</i>                                                                                       | EDL933 isogenic mutant with <i>frdA</i> gene deleted; Kan <sup>R</sup>                                                                                                             | this study          |
| EDL933: $\Delta$ <i>fumC</i> $\Delta$ <i>fumA</i>                                                                  | EDL933 isogenic mutant with <i>fumC</i> gene and <i>fumA</i> gene deleted; Kan <sup>R</sup>                                                                                        | this study          |
| EDL933: $\Delta$ <i>mdh</i>                                                                                        | EDL933 isogenic mutant with <i>mdh</i> gene deleted; Kan <sup>R</sup>                                                                                                              | this study          |
| EDL933: $\Delta$ <i>gltA</i>                                                                                       | EDL933 isogenic mutant with <i>gltA</i> gene deleted; Kan <sup>R</sup>                                                                                                             | this study          |
| EDL933: $\Delta$ <i>ygfH</i>                                                                                       | EDL933 isogenic mutant with <i>ygfH</i> gene deleted; Cm <sup>R</sup>                                                                                                              | this study          |
| EDL933: $\Delta$ <i>sdhA</i> $\Delta$ <i>ygfH</i>                                                                  | EDL933 isogenic mutant with <i>sdhA</i> gene and <i>ygfH</i> gene deleted; Kan <sup>R</sup> Cm <sup>R</sup> kick out                                                               | this study          |
| EDL933: $\Delta$ <i>arcA</i>                                                                                       | EDL933 isogenic mutant with <i>arcA</i> gene deleted; Kan <sup>R</sup>                                                                                                             | this study          |
| EDL933: $\Delta$ <i>arcB</i>                                                                                       | EDL933 isogenic mutant with <i>arcB</i> gene deleted; Kan <sup>R</sup>                                                                                                             | this study          |
| EDL933: $\Delta$ <i>arcA</i> $\Delta$ <i>arcB</i>                                                                  | EDL933 isogenic mutant with <i>arcA</i> gene and <i>arcB</i> gene deleted; Kan <sup>R</sup> Cm <sup>R</sup>                                                                        | this study          |
| EDL933: $\Delta$ <i>fnr</i>                                                                                        | EDL933 isogenic mutant with <i>fnr</i> gene deleted; Kan <sup>R</sup>                                                                                                              | this study          |
| EDL933: $\Delta$ <i>narH</i> $\Delta$ <i>narJ</i><br>$\Delta$ <i>narI</i>                                          | EDL933 isogenic mutant with <i>narH</i> gene, <i>narJ</i> gene, and <i>narI</i> gene deleted; Kan <sup>R</sup>                                                                     | this study          |
| EDL933: $\Delta$ <i>adhE</i>                                                                                       | EDL933 isogenic mutant with <i>adhE</i> gene deleted; Kan <sup>R</sup>                                                                                                             | this study          |
| EDL933: $\Delta$ <i>nrdD</i> $\Delta$ <i>nrdG</i>                                                                  | EDL933 isogenic mutant with <i>nrdD</i> gene and <i>nrdG</i> gene deleted; Kan <sup>R</sup>                                                                                        | this study          |
| EDL933: $\Delta$ <i>narH</i> $\Delta$ <i>narJ</i><br>$\Delta$ <i>narI</i> $\Delta$ <i>fnr</i> $\Delta$ <i>adhE</i> | EDL933 isogenic mutant with <i>narH</i> <i>narJ</i> <i>narI</i> gene deleted; Kan <sup>R</sup> kick out, <i>fnr</i> gene; Kan <sup>R</sup> , and <i>adhE</i> gene; Cm <sup>R</sup> | this study          |
| EDL933: $\Delta$ <i>sdhA</i> $\Delta$ <i>tnaA</i>                                                                  | EDL933 isogenic mutant with <i>sdhA</i> gene; Kan <sup>-</sup> , and <i>tnaA</i> gene deleted; Kan <sup>R</sup>                                                                    | this study          |

**Table S3. Plasmids used in this study.**

| <b>Plasmid</b> | <b>Relevant characteristics</b>                                                | <b>Source or reference</b> |
|----------------|--------------------------------------------------------------------------------|----------------------------|
| pFPV25.1       | Vector for constitutive GFP expression; <i>rpsM::gfpmut</i> ; Amp <sup>R</sup> | (17)                       |
| pKD46          | Red recombinase expression; Amp <sup>R</sup>                                   | (2, 18)                    |
| pKD3           | Template plasmid for Cm <sup>R</sup> cassette                                  | (2)                        |
| pKD4           | Template plasmid for Kan <sup>R</sup> cassette                                 | (2)                        |
| pQE30          | Amp <sup>R</sup> , T5 expression vector                                        | Qiagen, USA                |
| pCP20          | FLP recombinase expression; Amp <sup>R</sup> Cm <sup>R</sup>                   | (2)                        |
| pWF134         | <i>sdhCDAB</i> expressing plasmid; Amp <sup>R</sup>                            | this study                 |

**Table S4. Primers used in cloning, mutant construction, and qRT-PCR in this study.**

| <b>Name</b>                                            | <b>Oligonucleotides</b>                                |
|--------------------------------------------------------|--------------------------------------------------------|
| <b>Primers used for cloning (5' to 3')</b>             |                                                        |
| pQE30- <i>sdhCDAB</i> F5                               | ACATGCATGCTTAAGGTCTCCTTAGCGCC                          |
| pQE30- <i>sdhCDAB</i> R3                               | ACGCGTCGACGCCGCATCCGGCACTGGTTG                         |
| <b>Primers used for mutant construction (5' to 3')</b> |                                                        |
| <i>sdhA</i> F5                                         | GGATTCGTTGTGGTGTGGGGTGTGTGATGAGTGTAGGCTGGAGCTGCTTC     |
| <i>sdhA</i> R3                                         | CATTTTCCTGTCTCCGCATTAGTAAGTACGCATATGAATATCCTCCTTAG     |
| <i>sdhA</i> Up R3                                      | TCATCACACACCCACACCACAACGAATCC                          |
| Check <i>sdhA</i> F5                                   | CTATCTGGAAGAAACATTCCG                                  |
| Check <i>sdhA</i> R3                                   | AGGGTGTAAATCCTGCATAC                                   |
| <i>sdhB</i> F5                                         | GTACTIONACTAATGCGGAGACAGGAAAATGAGTGTAGGCTGGAGCTGCTTC   |
| <i>sdhB</i> R3                                         | TCTTATCAGGCCTACGGTTTACGCATTACGCATATGAATATCCTC CTTAG    |
| <i>sdhB</i> Up R3                                      | TCATTTTCCTGTCTCCGCATTAGTAAGTAC                         |
| Check <i>sdhB</i> F5                                   | AGCATAACTTCTCGGTCTTC                                   |
| Check <i>sdhB</i> R3                                   | ATACTACCACGCACAGTGAT                                   |
| <i>sdhC</i> F5                                         | ATAAGAACAGCATGTGGGCGTTATTCATGAGTGTAGGCTGGAGCTGCTTC     |
| <i>sdhC</i> R3                                         | CTAATGCGGAGGCGTTGCTTACCATACGAGCATATGAATATCCTCCTTAG     |
| <i>sdhC</i> Up R3                                      | TCATGAATAACGCCACATG CTGTTCTTAT                         |
| Check <i>sdhC</i> F5                                   | CTAATAACTGTCCCGAATGA                                   |
| Check <i>sdhC</i> R3                                   | ATAAATCACGTAAACCACCA                                   |
| <i>sdhD</i> F5                                         | CTTTCACCTTCTCGCAGGAGTCCTCGTATGGGTGTAGGCTGGAGCTGCTTC    |
| <i>sdhD</i> R3                                         | CTCTGACTGGCAATTTTCATCACACACCCACATATGAATATCCTCCTTAG     |
| <i>sdhD</i> Up R3                                      | CCATACGAGGACTCCTGCGAGAAGTGAAAG                         |
| Check <i>sdhD</i> F5                                   | TATCACGTCGTCGTAGGTAT                                   |
| Check <i>sdhD</i> R3                                   | CCGGTTTTACACATATATTC A                                 |
| <i>acnB</i> F5                                         | GAATACCGTAAGCACGTAGCTGAGCGTGCCGTGTAGGCTGGAGCTGCTTC     |
| <i>acnB</i> R3                                         | AGTCTGGAAAATCACCCCATCGGCTTTCTC CATAT GAATA TCCTC CTTAG |
| <i>acnB</i> Up R3                                      | GGCACGCTCAGCTACGTGCTTACGGTATTC                         |
| Check <i>acnB</i> F5                                   | TTCATAATTCGGATCTCAAG                                   |
| Check <i>acnB</i> R3                                   | TTCGTCGTAGTAGTTCATCC                                   |
| <i>icdA</i> F5                                         | AAAGTAGTTGTTCCGGCACAAGGCAAGAAGGTGTAGGCTGGAGCTGCTTC     |
| <i>icdA</i> R3                                         | CTTGATGATCGCGTCACCAAACCTCTGAACACATATGAATATCCTCCTTAG    |
| <i>icdA</i> Up R3                                      | CTTCTTGCCCTTGTCGCCGGAACAACACTTTT                       |
| Check <i>icdA</i> F5                                   | TATTGGTCAGCACCAGTAAC                                   |
| Check <i>icdA</i> R3                                   | CATTACCGTCACACTACCTC                                   |

|                      |                                                     |
|----------------------|-----------------------------------------------------|
| <i>sucA</i> F5       | AGCGCTTTGAAAGCCTGGTTGGACTCTTCTGTGTAGGCTGGAGCTGCTTC  |
| <i>sucB</i> R3       | CAGCAGCAGACGCGTCGGATCTTCCAGCAACATATGAATATCCTCCTTAG  |
| <i>sucA</i> Up R3    | AGAAGAGTCCAACCAGGCTTTCAAAGCGCT                      |
| Check <i>sucA</i> F5 | AGTGTATTCCGCTGTCATAG                                |
| Check <i>sucB</i> R3 | ACGTGAACTACGGTCTACAA                                |
| <i>sucC</i> F5       | CGATTACTGAAGGATGGACAGAACACATGAGTGTAGGCTGGAGCTGCTTC  |
| <i>sucC</i> R3       | TATCAATTAATAATGGACATTATTTCCCCTCCATATGAATATCCTCCTTAG |
| <i>sucC</i> Down F5  | GAGGGGAAATAATGTCCATTTTAATTGATA                      |
| Check <i>sucC</i> F5 | TGGTAACGATCAAAGAGTTG                                |
| Check <i>sucC</i> R3 | GGTGATAATCAGTTTGATGC                                |
| <i>sucD</i> F5       | GTTGTTGCCGCGAGTGGAGGGGAAATAATGTGTGTAGGCTGGAGCTGCTTC |
| <i>sucD</i> R3       | ATTTCTTATTACAGATATTTATTTTCAGAACCATATGAATATCCTCCTTAG |
| <i>sucD</i> Down F5  | GTTCTGAAATAAATATCTGTAATAAGAAAT                      |
| Check <i>sucD</i> F5 | GATCTGATTTGCCTCGAC                                  |
| Check <i>sucD</i> R3 | ATCCCTCTAAGAATTTTTGC                                |
| <i>frdA</i> F5       | GGATAAAAACAATCTGGAGGAATGTCGTGCGTGTAGGCTGGAGCTGCTTC  |
| <i>frdA</i> R3       | ATTTTCAGGTTTTTCATCTCAGCCATTGCCATATGAATATCCTCCTTAG   |
| <i>frdA</i> Up R3    | GCACGACATTCCTCCAGATTGTTTTTATCC                      |
| Check <i>frdA</i> F5 | TCTCGTCAAATTTCAGACTT                                |
| Check <i>frdA</i> R3 | GGGTCTGGATGTTAGTACC                                 |
| <i>fumC</i> F5       | AATTAATCAGGTGAGGAGTAGGCCATGAGTGTAGGCTGGAGCTGCTTC    |
| <i>fumC</i> R3       | GCACCTGTATGTTGCAGATTAACGCCCGGCCATATGAATATCCTCCTTAG  |
| <i>fumC</i> Down F5  | GCCGGGCGTTAATCTGCAACATACAGGTGC                      |
| Check <i>fumC</i> F5 | TTTTACATGGCACGAAAG                                  |
| Check <i>fumC</i> R3 | TGGTTGGGCTAATAAACATA                                |
| <i>fumA</i> F5       | CAAACCAGGCAGTAAGTGAGAAAACAATGTGTGTAGGCTG GAGCTGCTTC |
| <i>fumA</i> R3       | CCCGAAGGGCGGCTCTGTTTATTTACACACATATGAATATCCTCCTTAG   |
| <i>fumA</i> Up R3    | ACATTGTTTTCTCACTTACTGCCTGGTTTG                      |
| Check <i>fumA</i> F5 | GATGAACCTGAATGGAGAGT                                |
| Check <i>fumA</i> R3 | CTGTTTTGCTTTTCGTTAAGT                               |
| <i>mdh</i> F5        | TTTATCAATATAATAAGGAGTTTAGGATGAGTGTAGGCTGGAGCTGCTTC  |
| <i>mdh</i> R3        | TTATTATCCGCTAATCAATTACTTATTAACCATATGAATATCCTCCTTAG  |
| <i>mdh</i> Down F5   | GTTAATAAGTAATTGATTAGCGGATAATAA                      |
| Check <i>mdh</i> F5  | TGAAGAAGGCTGAAATAATG                                |
| Check <i>mdh</i> R3  | AACTGATGGGCATTAACAC                                 |
| <i>gltA</i> F5       | GCAATAAGGCGCTAAGGAGACCTTAAATGGGTGTAGGCTGGAGCTGCTTC  |
| <i>gltA</i> R3       | ATGGTTCAAATCAGATAATTAATGTTTAACCATATGAATATCCTCCTTAG  |
| <i>gltA</i> Up R3    | CCATTTAAGGTCTCCTTAGCGCCTTATTGC                      |
| check <i>gltA</i> F5 | TCATTCCGGACAGTTATTAG                                |



|                      |                                                                                                            |
|----------------------|------------------------------------------------------------------------------------------------------------|
| check <i>gltA</i> R3 | CTTCATGGGCTATGATAAAG                                                                                       |
| <i>ygfH</i> F5       | CAGTGGACAAGGATGACCGCCGATGAAGCGGTGTAGGCTGGAGCTGCTTC                                                         |
| <i>ygfH</i> R3       | CATCGAGCCGGTTGCAATTAATTACGGTGCATATGAATATCCTCCTTAG                                                          |
| <i>ygfH</i> Up R3    | CGCTTCATCGGCGGTCATCCTTGTCCACTG                                                                             |
| Check <i>ygfH</i> F5 | TCAAAGAGCTGATTTTTACC                                                                                       |
| Check <i>ygfH</i> R3 | CTTTTTGACCGTCAGTTAGA                                                                                       |
| <i>arcA</i> F5       | TTTAGTTGGCAATTTAGGTAGCAAACATGCGTGTAGGCTGGAGCTGCTTC                                                         |
| <i>arcA</i> R3       | TGACGGTGGTAAAGCCGATTAATCTTCCAGCATATGAATATCCTCCTTAG                                                         |
| <i>arcA</i> Up R3    | GCATGTTTGCTACCTAAATTGCCAACTAAA                                                                             |
| Check <i>arcA</i> F5 | CCTGACTGTACTAACGGTTTA                                                                                      |
| Check <i>arcA</i> R3 | TTCTGAACATACCGGTTTTA                                                                                       |
| <i>arcB</i> F5       | GCAGGTTGTCGTGAAGGAATTCCCTAATGAGTGTAGGCTGGAGCTGCTTC                                                         |
| <i>arcB</i> R3       | ACCCCGGTCTAGCCGGGGTCATTTTTTAGTCATATGAATATCCTCCTTAG                                                         |
| <i>arcB</i> Up R3    | TCATTAGGGAATTCCTTCACGACAACCTGC                                                                             |
| Check <i>arcB</i> F5 | CTGAAGGTGTGTTCTCACTTA                                                                                      |
| Check <i>arcB</i> R3 | TGCGTGAAATAGCTAACAA                                                                                        |
| <i>fnr</i> F5        | ATATCAATTACGGCTTGAGCAGACCTATGAGTGTAGGCTGGAGCTGCTTC                                                         |
| <i>fnr</i> R3        | GTGAGTTATGCGGAAAATCAGGCAACGTTTCATATGAATATCCTCCTTAG                                                         |
| <i>fnr</i> Up R3     | TCATAGGTCTGCTCAAGCCGTAATTGATAT                                                                             |
| Check <i>fnr</i> F5  | TGGAAAACACTACGCACTAT                                                                                       |
| Check <i>fnr</i> R3  | TTATGCCAGACCACTTTAAT                                                                                       |
| <i>narH</i> F5       | AATGATCAGGTACAGGAGAGCGTAAAATGAGTGTAGGCTGGAGCTGCTTC                                                         |
| <i>narI</i> R3       | ATGTGAACTAAAATTCGCTTAGTGACGAGCCATATGAATATCCTCCTTAG                                                         |
| <i>narH</i> Up R3    | TCATTTTACGCTCTCCTGTACCTGATCATT                                                                             |
| Check <i>narH</i> F5 | GGTATCCACTCCACCTACA                                                                                        |
| Check <i>narI</i> R3 | CAAACGAATCCGTAATTTAA                                                                                       |
| <i>adhE</i> F5       | AAGTTTAAACATTATCAGGAGAGCATTATGGGTGTAGGCTGGAGCTGCTTC                                                        |
| <i>adhE</i> R3       | GCCAGACAGCGCTACTGATTAAGCGGATTTTCATATGAATATCCTCCTTAG                                                        |
| <i>adhE</i> Up R3    | CCATAATGCTCTCCTGATAATGTTAACTT                                                                              |
| Check <i>adhE</i> F5 | AGCCACCAAATCATACTACA                                                                                       |
| Check <i>adhE</i> R3 | AAAAACCATCTGTTTTTGTG                                                                                       |
| <i>nrdD</i> F5       | CATGTGATGAAACGAGACGGCTGCAAAGTGGTGTAGGCTGGAGCTGCTTC                                                         |
| <i>nrdG</i> R3       | ATGATGCACCACCTGATTGCTGCTGCCGCGCATATGAATATCCTCCTTAG                                                         |
| <i>nrdD</i> Up R3    | CACTTTGCAGCCGTCTCGTTTCATCATG                                                                               |
| Check <i>nrdD</i> F5 | TTGTGATGCATAACTACGAA                                                                                       |
| Check <i>nrdG</i> R3 | CAATTTAAAAGTGGTTCGAAA                                                                                      |
| <i>tnaA</i> F5       | TATGTAATGGAAAACCTTTAAACATCTCCCTGTGTAGGCTGGAGCTGCTTC<br>TATGTAATGGAAAACCTTTAAACATCTCCCTGTGTAGGCTGGAGCTGCTTC |
| <i>tnaA</i> R3       | TTTCAGTTTTGCGGTGAAGTGACGCAATACCATATGAATATCCTCCTTAG                                                         |

|                                                     |                                |
|-----------------------------------------------------|--------------------------------|
| <i>tnaA</i> Up R3                                   | AGGGAGATGTTTAAAGTTTTCCATTACATA |
| Check <i>tnaA</i> F5                                | TCTCATAAACACAGCCAATA           |
| Check <i>tnaA</i> R3                                | ATACGTGGATTAGCGTGATA           |
| <b>Primers used for real time RT-PCR (5' to 3')</b> |                                |
| qPCR <i>tnaA</i> F5                                 | AGGGATTAGAACGCGGTATTG          |
| qPCR <i>tnaA</i> R3                                 | CGGAGTTACTGGTGATGGTTG          |
| qPCR <i>dnaJ</i> F5                                 | ACCAAAGAGATCCGCATTCC           |
| qPCR <i>dnaJ</i> R3                                 | ACGGCAAAGAAACCCTGG             |
| qPCR <i>rpoA</i> F5                                 | GTGACCCTTGAGCCTTTAGAG          |
| qPCR <i>rpoA</i> R3                                 | ACACCATCAATCTCAACCTCG          |

**Table S5. Proteins with differential expression in the wild-type EHEC strain (EDL933), the isogenic *sdhA* deletion mutant (EDL933: $\Delta$ *sdhA*), and the *sdhA* gene complementation strain (EDL933: $\Delta$ *sdhA*-pWF134).**

| Protein Name                                                        | Mass(Da) | EDL933          | $\Delta$ <i>sdhA</i> | <i>t</i> -Test | Fold Change |
|---------------------------------------------------------------------|----------|-----------------|----------------------|----------------|-------------|
| <b>Down regulation in <math>\Delta</math><i>sdhA</i> VS. EDL933</b> |          |                 |                      |                |             |
| Agmatinase                                                          | 33557    | 0.84 $\pm$ 0.13 | 0 $\pm$ 0            | 0.0032         | -100        |
| Alcohol dehydrogenase YqhD                                          | 42097    | 0.84 $\pm$ 0.14 | 0 $\pm$ 0            | 0.0033         | -100        |
| Aspartate--ammonia ligase                                           | 36691    | 1.11 $\pm$ 0.12 | 0 $\pm$ 0            | 0.0008         | -100        |
| Chaperone protein DnaJ                                              | 41044    | 1.47 $\pm$ 0.32 | 0 $\pm$ 0            | 0.0103         | -100        |
| Dimethyl sulfoxide reductase DmsA                                   | 90399    | 1.11 $\pm$ 0.29 | 0 $\pm$ 0            | 0.0193         | -100        |
| Flavodoxin-1                                                        | 19737    | 1.39 $\pm$ 0.05 | 0 $\pm$ 0            | 1E-05          | -100        |
| GDP-L-fucose synthase                                               | 36141    | 0.63 $\pm$ 0.02 | 0 $\pm$ 0            | 0              | -100        |
| Hydrogenase-1 large chain                                           | 66253    | 1.18 $\pm$ 0.17 | 0 $\pm$ 0            | 0.0021         | -100        |
| Nitrate/nitrite response regulator protein NarL                     | 23927    | 0.77 $\pm$ 0.15 | 0 $\pm$ 0            | 0.0075         | -100        |
| Periplasmic nitrate reductase                                       | 93130    | 0.7 $\pm$ 0.06  | 0 $\pm$ 0            | 0.0003         | -100        |
| Uncharacterized protein YibN                                        | 15596    | 0.7 $\pm$ 0.07  | 0 $\pm$ 0            | 0.0004         | -100        |
| Uncharacterized protein YniA                                        | 32474    | 0.84 $\pm$ 0.02 | 0 $\pm$ 0            | 0              | -100        |
| Succinate dehydrogenase iron-sulfur subunit                         | 26770    | 4.06 $\pm$ 0.37 | 0.39 $\pm$ 0.39      | 0.0024         | -10.31      |
| Succinate dehydrogenase flavoprotein subunit                        | 64422    | 9.5 $\pm$ 0.23  | 1.01 $\pm$ 1.01      | 0.0011         | -9.45       |
| Xaa-Pro aminopeptidase                                              | 49815    | 1.18 $\pm$ 0.13 | 0.22 $\pm$ 0.22      | 0.0179         | -5.49       |
| Universal stress protein E                                          | 35707    | 2.22 $\pm$ 0.36 | 0.52 $\pm$ 0.27      | 0.0190         | -4.24       |
| Osmotically-inducible protein Y                                     | 21074    | 1.39 $\pm$ 0.17 | 0.43 $\pm$ 0.22      | 0.0246         | -3.22       |

|                                                 |        |              |              |        |       |
|-------------------------------------------------|--------|--------------|--------------|--------|-------|
| Protein HemY                                    | 45245  | 1.82 ± 0.09  | 0.81 ± 0.14  | 0.0034 | -2.24 |
| Chaperone protein skp                           | 17688  | 2.45 ± 0.19  | 1.21 ± 0.36  | 0.0392 | -2.03 |
| Fumarate reductase iron-sulfur subunit          | 27123  | 2.24 ± 0.3   | 1.19 ± 0.17  | 0.0370 | -1.88 |
| 30S ribosomal protein S12                       | 13737  | 4.41 ± 0.67  | 2.38 ± 0.12  | 0.0404 | -1.86 |
| Protein YdgH                                    | 33903  | 2.59 ± 0.26  | 1.4 ± 0.3    | 0.0389 | -1.85 |
| Tryptophanase                                   | 52773  | 37.08 ± 2.43 | 20.99 ± 2.55 | 0.0102 | -1.77 |
| Cystine-binding periplasmic protein             | 29039  | 1.54 ± 0.18  | 0.89 ± 0.03  | 0.0247 | -1.72 |
| 3-mercaptopyruvate sulfurtransferase            | 30826  | 1.54 ± 0.06  | 0.9 ± 0.15   | 0.0186 | -1.71 |
| 50S ribosomal protein L13                       | 16019  | 9.35 ± 0.4   | 7.87 ± 0.28  | 0.0374 | -1.19 |
| Molecular chaperone Hsp31 and glyoxalase 3      | 31220  | 1.05 ± 0.02  | 0.89 ± 0.03  | 0.0080 | -1.17 |
| <b>Up regulation in <i>ΔsdhA</i> VS. EDL933</b> |        |              |              |        |       |
| Inosine-5'-monophosphate dehydrogenase          | 52022  | 4.68 ± 0.07  | 5.41 ± 0.13  | 0.0071 | 1.16  |
| Aconitate hydratase 2                           | 93498  | 21.29 ± 0.24 | 24.85 ± 0.28 | 0.0006 | 1.17  |
| 2-oxoglutarate dehydrogenase E1 component       | 105062 | 20.31 ± 0.41 | 25.38 ± 1.66 | 0.0409 | 1.25  |
| Phosphopentomutase                              | 44370  | 6.21 ± 0.1   | 7.92 ± 0.49  | 0.0271 | 1.27  |
| Phosphate acetyltransferase                     | 77172  | 9.57 ± 0.13  | 12.38 ± 0.91 | 0.0383 | 1.29  |
| Long-chain fatty acid transport protein         | 48539  | 2.11 ± 0.46  | 3.95 ± 0.37  | 0.0361 | 1.87  |
| Putative uncharacterized protein                | 29257  | 1.54 ± 0.18  | 3.11 ± 0.06  | 0.0011 | 2.03  |
| Flagellin                                       | 51295  | 5.09 ± 0.54  | 10.98 ± 1.25 | 0.0123 | 2.16  |
| Flagellin (Fragment)                            | 56672  | 3.38 ± 1.48  | 7.77 ± 0.54  | 0.0497 | 2.3   |
| 50S ribosomal protein L20                       | 13497  | 0.21 ± 0.21  | 2.3 ± 0.43   | 0.0121 | 11.11 |
| Phosphomannomutase                              | 50340  | 0 ± 0        | 1.25 ± 0.37  | 0.0277 | 100   |

| <b>Up regulation in <math>\Delta</math>sdhA-pWF134 vs. <math>\Delta</math>sdhA</b>   |        |              |               |        |       |
|--------------------------------------------------------------------------------------|--------|--------------|---------------|--------|-------|
| Ampicillin resistance protein                                                        | 31557  | 0 ± 0        | 1.23 ± 0.14   | 0.0008 | 100   |
| Beta-galactosidase                                                                   | 116462 | 0 ± 0        | 2.14 ± 0.49   | 0.0120 | 100   |
| Beta-lactamase                                                                       | 31515  | 0 ± 0        | 0.87 ± 0.12   | 0.0018 | 100   |
| Beta-lactamase TEM                                                                   | 31515  | 0 ± 0        | 8 ± 0.38      | 3E-05  | 100   |
| Chaperone protein DnaJ                                                               | 41044  | 0 ± 0        | 1.51 ± 0.16   | 0.0007 | 100   |
| Protein dcrB                                                                         | 19787  | 0 ± 0        | 1.29 ± 0.41   | 0.0347 | 100   |
| Putative acyl-CoA thioester hydrolase ybhC                                           | 46082  | 0 ± 0        | 0.79 ± 0.04   | 5E-05  | 100   |
| Succinate dehydrogenase                                                              | 26784  | 0 ± 0        | 6.18 ± 1.21   | 0.0069 | 100   |
| Succinate dehydrogenase flavoprotein subunit                                         | 64422  | 1.01 ± 1.01  | 71.48 ± 16.92 | 0.0141 | 70.92 |
| Succinate dehydrogenase iron-sulfur subunit                                          | 26770  | 0.39 ± 0.39  | 26 ± 1.98     | 0.0002 | 65.79 |
| Lactaldehyde dehydrogenase                                                           | 52273  | 1.03 ± 0.62  | 2.96 ± 0.18   | 0.0414 | 2.86  |
| Tryptophanase                                                                        | 52773  | 20.99 ± 2.55 | 47.72 ± 4.72  | 0.0075 | 2.27  |
| Acriflavine resistance protein A                                                     | 42197  | 2.22 ± 0.08  | 3.75 ± 0.39   | 0.0186 | 1.69  |
| Adenylosuccinate synthetase                                                          | 47345  | 6.33 ± 0.82  | 10.66 ± 0.72  | 0.0163 | 1.68  |
| Chaperone protein DnaK                                                               | 69115  | 27.4 ± 2.12  | 38.29 ± 2.53  | 0.0300 | 1.4   |
| Chaperone protein HtpG                                                               | 71449  | 14.15 ± 0.23 | 19.75 ± 1.98  | 0.0482 | 1.4   |
| Protein GrpE                                                                         | 21741  | 2.3 ± 0.08   | 2.83 ± 0.09   | 0.0128 | 1.23  |
| <b>Down regulation in <math>\Delta</math>sdhA-pWF134 VS. <math>\Delta</math>sdhA</b> |        |              |               |        |       |
| Pyruvate dehydrogenase E1 component                                                  | 99668  | 26.62 ± 0.08 | 23.11 ± 0.94  | 0.0203 | -1.15 |
| Aerobic respiration control protein ArcA                                             | 27292  | 4.31 ± 0.21  | 3.16 ± 0.31   | 0.0390 | -1.36 |

|                                                       |          |              |               |        |       |
|-------------------------------------------------------|----------|--------------|---------------|--------|-------|
| DNA-directed RNA polymerase subunit beta              | 150632   | 37.4 ± 2.31  | 27.38 ± 2.2   | 0.0349 | -1.37 |
| Peroxiredoxin OsmC                                    | 15088    | 2.3 ± 0.08   | 1.66 ± 0.14   | 0.0185 | -1.38 |
| Transcriptional regulatory protein OmpR               | 27354    | 3.32 ± 0.39  | 2.17 ± 0.09   | 0.0454 | -1.53 |
| 2-oxoglutarate dehydrogenase E1 component             | 105062   | 25.38 ± 1.66 | 16.31 ± 0.3   | 0.0057 | -1.56 |
| Uncharacterized protein YggE                          | 26635    | 1.48 ± 0.16  | 0.94 ± 0.05   | 0.0323 | -1.57 |
| Aconitate hydratase 1                                 | 97677    | 14.08 ± 0.66 | 8.63 ± 1.54   | 0.0312 | -1.63 |
| Glutamate decarboxylase alpha                         | 52699    | 98.17 ± 8.26 | 52.19 ± 12.15 | 0.0352 | -1.88 |
| Mannose-1-phosphate guanylyltransferase 2             | 54270    | 3.05 ± 0.22  | 1.5 ± 0.28    | 0.0122 | -2.04 |
| Long-chain fatty acid transport protein               | 48539    | 3.95 ± 0.37  | 1.88 ± 0.34   | 0.0148 | -2.1  |
| Biosynthetic arginine decarboxylase                   | 73886    | 2.43 ± 0.33  | 1.07 ± 0.29   | 0.0361 | -2.28 |
| Flagellin                                             | 51295    | 10.98 ± 1.25 | 2.81 ± 0.73   | 0.0048 | -3.91 |
| Probable phospholipid-binding protein MlaC            | 23963    | 2.45 ± 0.39  | 0.61 ± 0.34   | 0.0231 | -4.04 |
| Glutaminase 1                                         | 32844    | 0.88 ± 0.11  | 0.21 ± 0.21   | 0.0482 | -4.15 |
| HTH-type transcriptional regulator IscR               | 17337    | 1.12 ± 0.16  | 0.21 ± 0.21   | 0.0272 | -5.27 |
| Flagellin (Fragment)                                  | 56672    | 7.77 ± 0.54  | 1.36 ± 0.24   | 0.0004 | -5.69 |
| Cyclopropane-fatty-acyl-phospholipid synthase         | 43777.81 | 1.12 ± 0.06  | 0 ± 0         | 0      | -100  |
| Lysine-arginine-ornithine-binding periplasmic protein | 27992    | 1.33 ± 0.23  | 0 ± 0         | 0.0044 | -100  |
| Protein phosphatase CheZ                              | 23976    | 1.9 ± 0.5    | 0 ± 0         | 0.0184 | -100  |

**Table S6: Transposon candidate genes list**

| GO category        | Total gene/hit number | Gene Name        | Segment Type  | Primary Hit                                | <i>P</i> value of liquid-based survival (EDL933 vs mutants) | <i>P</i> value of agar-based survival (EDL933 vs mutants) | Product or Function                                                                                                                             |
|--------------------|-----------------------|------------------|---------------|--------------------------------------------|-------------------------------------------------------------|-----------------------------------------------------------|-------------------------------------------------------------------------------------------------------------------------------------------------|
| Metabolism         | 26/32                 | <i>sdhA</i>      | backbone      | ED97-A-1                                   | < 0.0001                                                    | < 0.0001                                                  | succinate dehydrogenase, flavoprotein subunit; Energy metabolism, carbon: TCA cycle                                                             |
|                    |                       | <i>sdhC</i>      | backbone      | ED201-E-9                                  | < 0.0001                                                    | < 0.0001                                                  | succinate dehydrogenase, cytochrome b556; Energy metabolism, carbon: TCA cycle                                                                  |
|                    |                       | <i>gltA/sdhC</i> | backbone      | ED29-D-11, ED54-D-6                        | < 0.0001(ED54D-6)                                           | < 0.0001 (ED29-D-11), < 0.0001 (ED54-D-6)                 | type II citrate synthase / succinate dehydrogenase, cytochrome b556; Energy metabolism, carbon: TCA cycle                                       |
|                    |                       | <i>mdh</i>       | backbone      | ED61-A-7, ED61-C-11                        | < 0.0001, < 0.0001                                          | growth defect                                             | malate dehydrogenase; Energy metabolism, carbon: TCA cycle                                                                                      |
|                    |                       | <i>manB</i>      | 84 O-Island   | ED56-G-9                                   | < 0.0001                                                    | < 0.0001                                                  | phosphomannomutase; Central intermediary metabolism                                                                                             |
|                    |                       | <i>treC</i>      | backbone      | ED38-B-9                                   | < 0.0001                                                    | 0.4107                                                    | trehalase 6-P hydrolase; Degradation of small molecules: Carbon compounds                                                                       |
|                    |                       | <i>bioH</i>      | backbone      | ED185-D-2                                  | 0.0073                                                      | < 0.0001                                                  | biotin biosynthesis; Biosynthesis of cofactors, carriers: Biotin                                                                                |
|                    |                       | <i>fbp</i>       | backbone      | ED1-A-7                                    | < 0.0001                                                    | 0.0929                                                    | fructose-bisphosphatase; Central intermediary metabolism: Gluconeogenesis                                                                       |
|                    |                       | <i>nuoI</i>      | backbone      | ED135-E-12                                 | < 0.0001                                                    | 0.7054                                                    | NADH dehydrogenase I chain I; Energy metabolism, carbon: Aerobic respiration                                                                    |
|                    |                       | <i>nuoB</i>      | backbone      | ED208-B-9                                  | < 0.0001                                                    | 0.0232                                                    | NADH dehydrogenase I chain B; Energy metabolism, carbon: Aerobic respiration                                                                    |
|                    |                       | <i>nuoH</i>      | backbone      | ED196-G-6                                  | < 0.0001                                                    | < 0.0001                                                  | NADH dehydrogenase I chain H; Energy metabolism, carbon: Aerobic respiration                                                                    |
|                    |                       | <i>nuoM</i>      | backbone      | ED207-F-4                                  | < 0.0001                                                    | 0.2743                                                    | NADH dehydrogenase I chain M; Energy metabolism, carbon: Aerobic respiration                                                                    |
|                    |                       | <i>nuoG</i>      | backbone      | ED203-B-3                                  | < 0.0001                                                    | 0.0294                                                    | NADH dehydrogenase I chain G; Energy metabolism, carbon: Aerobic respiration                                                                    |
|                    |                       | <i>atpI</i>      | backbone      | ED86-H-8                                   | < 0.0001                                                    | growth defect                                             | membrane-bound ATP synthase; ATP-proton motive force interconversion                                                                            |
|                    |                       | <i>atpD</i>      | backbone      | ED30-F-7                                   | < 0.0001                                                    | growth defect                                             | membrane-bound ATP synthase, F1 sector, beta-subunit; ATP-proton motive force interconversion                                                   |
|                    |                       | <i>aroA</i>      | backbone      | ED1-F-12                                   | < 0.0001                                                    | 0.003                                                     | 5-enolpyruvylshikimate-3-phosphate synthetase; Amino acid biosynthesis: Chorismate                                                              |
|                    |                       | <i>thrB</i>      | backbone      | ED139-D-5                                  | < 0.0001                                                    | auxotroph                                                 | homoserine kinase; Amino acid biosynthesis: Threonine                                                                                           |
|                    |                       | <i>pfs</i>       | backbone      | ED127-G-8                                  | < 0.0001                                                    | 0.0002                                                    | orf, hypothetical protein; Unknown function, 5'-methylthioadenosine/S-adenosylhomocysteine nucleosidase                                         |
|                    |                       | <i>udhA</i>      | backbone      | ED138-B-4, ED205-G-12, ED52-B-6            | < 0.0001, < 0.0001, < 0.0001                                | 0.0370 (ED138-B-4), 0.0468 (ED205-G-12),                  | putative oxidoreductase; Not classified                                                                                                         |
|                    |                       | <i>ubiE</i>      | backbone      | ED137-C-6                                  | < 0.0001                                                    | growth defect                                             | Biosynthesis of cofactors, carriers: Menaquinone, ubiquinone                                                                                    |
|                    |                       | <i>epd</i>       | Backbone      | ED160-C-11                                 | < 0.0001                                                    | 0.5628                                                    | D-erythrose 4-phosphate dehydrogenase; Central intermediary metabolism                                                                          |
|                    |                       | <i>gnd</i>       | backbone      | ED143-B-7, ED184-D-5                       | < 0.0001, < 0.0001                                          | < 0.0001(ED143-B-7) < 0.0001(ED184-D-5)                   | gluconate-6-phosphate dehydrogenase, decarboxylating                                                                                            |
|                    |                       | <i>pnp</i>       | backbone      | ED52-F-4                                   | < 0.0001                                                    | < 0.0001                                                  | polynucleotide phosphorylase; cytidylate kinase activity; Macromolecule synthesis, modification: RNA synthesis, modification, DNA transcription |
|                    |                       | <i>pta</i>       | backbone      | ED194-E-2                                  | < 0.0001                                                    | 0.1578                                                    | phosphotransacetylase; Degradation of small molecules: Carbon compounds                                                                         |
|                    |                       | <i>guaA</i>      | backbone      | ED86-A-10, ED174-A-9                       | < 0.0001, < 0.0001                                          | auxotroph                                                 | GMP synthetase (glutamine-hydrolyzing); Nucleotide biosynthesis: Purine ribonucleotide biosynthesis                                             |
|                    |                       | <i>bioC</i>      | backbone      | ED134 E-11                                 | < 0.0001                                                    | < 0.0001                                                  | biotin biosynthesis; reaction prior to pimeloyl CoA                                                                                             |
| Lipopolysaccharide |                       | <i>rfaD</i>      | 145 O-Island  | ED46-C-7                                   | < 0.0001                                                    | < 0.0001                                                  | ADP-L-glycero-D-mannoheptose-6-epimerase; Cell exterior constituents: Surface polysaccharides and antigens                                      |
|                    |                       | <i>rfaG</i>      | Hypervariable | ED55-A-3, ED132-A-10, ED189-H-9, D177-D-12 | < 0.0001, < 0.0001, < 0.0001, < 0.0001                      | < 0.0001 (ED55-A-3)                                       | glucosyltransferase I; lipopolysaccharide core biosynthesis                                                                                     |
|                    |                       | <i>rfaC</i>      | Junction      | ED122-G-3, ED203-A-4                       | < 0.0001, < 0.0001                                          | < 0.0001, < 0.0001                                        | heptosyl transferase I; lipopolysaccharide core biosynthesis                                                                                    |
|                    |                       | <i>rfaF</i>      | backbone      | ED74-D-7                                   | < 0.0001                                                    | < 0.0001                                                  | ADP-heptose--lps heptosyltransferase II; lipopolysaccharide core biosynthesis                                                                   |
|                    |                       | Z4405            | backbone      | ED196-F-4                                  | < 0.0001                                                    | < 0.0001                                                  | putative kinase; Not classified, RfaE-like                                                                                                      |
|                    |                       | <i>waal</i>      | 145 O-Island  | ED48-B-1, ED84-G-10, ED58-D-3, ED51-A-6    | 0.0003 (ED84G-10), < 0.0001 (ED58D-3),                      | < 0.0001 (ED48-B-1), < 0.0001 (ED84-G-10)                 | putative LPS biosynthesis enzyme; Cell exterior constituents: Surface polysaccharides and antigens                                              |
|                    |                       | <i>waaP</i>      | Junction      | ED82-D-12, ED62-G-1, ED8-H-7, ED45-C-10    | < 0.0001, < 0.0001, < 0.0001, < 0.0001                      | < 0.0001 (ED82-D-12), 0.2475(ED62-G-1)                    | putative LPS biosynthesis enzyme; Cell exterior constituents: Surface polysaccharides and antigens                                              |

|                                           |       |             |                      |                                |                              |                                        |                                                                                                                                           |
|-------------------------------------------|-------|-------------|----------------------|--------------------------------|------------------------------|----------------------------------------|-------------------------------------------------------------------------------------------------------------------------------------------|
| & Cell exterior constituents biosynthesis | 15/33 | <i>wzy</i>  | 84 O-Island          | ED156-G-2,ED62-G-3,ED185-E-2   | < 0.0001, < 0.0001, 0.0005   | 0.0255 (ED156-G-2), 0.5712 (ED62-G-3)  | O antigen polymerase; Cell exterior constituents: Surface polysaccharides and antigens                                                    |
|                                           |       | <i>manC</i> | 84 O-Island          | ED190-D-5,ED137-E-4            | < 0.0001, < 0.0001           | < 0.0001 (ED137-E-4)                   | mannose-1-P guanosyltransferase; Cell exterior constituents: Surface polysaccharides and antigens                                         |
|                                           |       | <i>per</i>  | 84 O-Island          | ED186-D-7,ED206-H-5,ED208-F-11 | < 0.0001, 0.0009, < 0.0001   | < 0.0001 (ED186-D-7)                   | perosamine synthetase; Cell exterior constituents: Surface polysaccharides and antigens                                                   |
|                                           |       | <i>wbdP</i> | 84 O-Island          | ED68-E-1,ED130-A-11,ED105-H-5  | < 0.0001, < 0.0001, < 0.0001 | < 0.0001 (ED68-E-1)                    | glycosyl transferase; Cell exterior constituents: Surface polysaccharides and antigens                                                    |
|                                           |       | <i>csgB</i> | backbone             | ED210-H-9                      | < 0.0001                     | 0.018                                  | minor curlin subunit precursor, similar ro CsgA; Cell exterior constituents: Surface structures                                           |
|                                           |       | <i>fcl</i>  | 84 O-Island          | ED134-E-4                      | < 0.0001                     | < 0.0001                               | fucose synthetase; Cell exterior constituents: Surface polysaccharides and antigens                                                       |
|                                           |       | Z3198       | 84 O-Island          | ED12-E-8, ED151-H-5            | < 0.0001, < 0.0001           | < 0.0001 (ED12-E-8), 0.0002(ED151-H-5) | GDP-mannose dehydratase; Cell exterior constituents: Surface polysaccharides and antigens                                                 |
|                                           |       | <i>wbdR</i> | 84 O-Island          | ED155-D-11                     | < 0.0001                     | 0.0032                                 | acetyl transferase; Cell exterior constituents: Surface polysaccharides and antigens                                                      |
| Type three secretion system               | 4/4   | <i>eae</i>  | 148 O-Island         | ED184-F-2                      | < 0.0001                     | < 0.0001                               | intimin adherence protein; Extracellular functions: Secreted proteins                                                                     |
|                                           |       | Z2240/Z2241 | 62 O-Island/Junction | ED52-B-8                       | < 0.0001                     | 0.5175                                 | hypothetical protein/hypothetical protein, putative type III effector protein, T3SS effector-like protein EspR-homolog                    |
|                                           |       | Z3919/Z3920 | 108 O-Island         | ED38-H-5                       | 0.0014                       | 0.002                                  | hypothetical protein/hypothetical protein, non-LEE-encoded type III effector, T3SS secreted effector EspW-like protein                    |
|                                           |       | <i>ler</i>  | 148 O-Island         | ED7-C-4                        | 0.0005                       | 0.6197                                 | orf, hypothetical protein; Unknown function; DNA-binding protein H-NS, transcriptional regulator Ler-like                                 |
| Two component system                      | 2/3   | <i>ompR</i> | backbone             | ED14-C-5, ED176-A-4            | < 0.0001, < 0.0001           | < 0.0001                               | response regulator (sensor, EnvZ) affecting transcription of ompC and ompF: outer membrane protein synthesis; Global regulatory functions |
|                                           |       | Z3603       | backbone             | ED4-B-11                       | < 0.0001                     | 0.9179                                 | orf, hypothetical protein; Unknown function; phosphohistidine phosphatase                                                                 |
| DNA Recombination & Repair                | 3/3   | <i>ruvC</i> | backbone             | ED198-E-1                      | < 0.0001                     | < 0.0001                               | Holliday junction nuclease; resolution of structures; Macromolecule synthesis, modification                                               |
|                                           |       | <i>xerD</i> | backbone             | ED144-E-6                      | < 0.0001                     | 0.0002                                 | site-specific recombinase; Macromolecule synthesis, modification: DNA- replication, repair, modification                                  |
|                                           |       | Z1201       | 43 O-Island          | ED201-H-5                      | < 0.0001                     | 0.0517                                 | orf; Unknown function, EHEC-specific, UvrD/REP helicase-like protein                                                                      |
| Transport protein                         | 3/3   | <i>tolQ</i> | backbone             | ED152-E-9                      | < 0.0001                     | < 0.0001                               | inner membrane protein, membrane-spanning, maintains integrity of cell envelope; tolerance to group A colicins; Colicin-related functions |
|                                           |       | <i>tolA</i> | Junction             | ED198-C-3                      | < 0.0001                     | < 0.0001                               | membrane spanning protein, required for outer membrane integrity; Colicin-related functions                                               |
|                                           |       | <i>betT</i> | backbone             | ED201-A-1                      | < 0.0001                     | 0.0322                                 | high-affinity choline transport; Transport of small molecules: Other                                                                      |
| Cell Protection Systems                   | 3/3   | <i>cutC</i> | backbone             | ED203-G-2                      | < 0.0001                     | 0.0139                                 | copper homeostasis protein; Protection responses: Detoxification                                                                          |
|                                           |       | <i>yhjA</i> | backbone             | ED16-F-11                      | < 0.0001                     | < 0.0001                               | putative enzyme; Not classified, a predicted cytochrome c peroxidase                                                                      |
|                                           |       | <i>hdeA</i> | backbone             | ED159-G-6                      | < 0.0001                     | < 0.0001                               | orf, hypothetical protein; Unknown function, stress response protein acid-resistance protein;                                             |
| Hypothetical protein                      | 10/10 | <i>hfq</i>  | backbone             | ED185-H-8                      | < 0.0001                     | 0.0279                                 | host factor I for bacteriophage Q beta replication, a growth-related protein; unknown function                                            |
|                                           |       | <i>yhgA</i> | backbone             | ED15-D-2                       | 0.0029                       | < 0.0001                               | orf, hypothetical protein; Unknown function, transposase                                                                                  |
|                                           |       | <i>yheO</i> | backbone             | ED51-C-3                       | < 0.0001                     | 0.5491                                 | orf, hypothetical protein; Unknown function, DNA-binding transcriptional regulator                                                        |
|                                           |       | <i>ydeK</i> | backbone             | ED121-D-5                      | < 0.0001                     | 0.0099                                 | orf, hypothetical protein; Unknown function, putative lipoprotein/autotransporter; Extended Signal Peptide of Type V secretion system     |
|                                           |       | <i>yiaF</i> | backbone             | ED141-F-8                      | < 0.0001                     | 0.2029                                 | orf, hypothetical protein; Unknown function, putative outer membrane lipoprotein                                                          |
|                                           |       | Z1205       | 43 O-Island          | ED207-F-11                     | < 0.0001                     | < 0.0001                               | orf; Unknown function, EHEC-specific.                                                                                                     |
|                                           |       | Z2973       | 76 O-Island          | ED200-A-11                     | < 0.0001                     | < 0.0001                               | unknown protein encoded by prophage CP-933T, EHEC-specific.                                                                               |
|                                           |       | Z2256/Z2257 | 46 O-Island/Junction | ED163-E-10                     | < 0.0001                     | < 0.0001                               | Rhs element protein/Rhs element protein, Rhs family protein [Cell envelope biogenesis, outer membrane]                                    |
|                                           |       | Z0406/Z0407 | backbone             | ED1-A-9                        | < 0.0001                     | 0.0205                                 | hypothetical protein/putative transcription factor, ANK; ankyrin repeats; ankyrin repeats mediate protein-protein interactions            |
|                                           |       | <i>yagU</i> | backbone             | ED82-G-12                      | < 0.0001                     | auxotroph                              | orf; Unknown function                                                                                                                     |
| Total                                     | 66/91 |             |                      |                                |                              |                                        |                                                                                                                                           |



## References:

1. Hayashi, T., Kato, T., Furukawa, K. Respiratory chain analysis of *Zymomonas mobilis* mutants producing high levels of ethanol. *Appl Environ Microbiol.* 2012;78(16):5622-9.
2. Datsenko, KA., Wanner, BL. One-step inactivation of chromosomal genes in *Escherichia coli* K-12 using PCR products. *Proc Natl Acad Sci U S A.* 2000;97(12):6640-5.
3. Baba, T., et al. Construction of *Escherichia coli* K-12 in-frame, single-gene knockout mutants: the Keio collection. *Mol Syst Biol.* 2006;2:2006 0008.
4. Doublet, B., et al. Antibiotic marker modifications of lambda Red and FLP helper plasmids, pKD46 and pCP20, for inactivation of chromosomal genes using PCR products in multidrug-resistant strains. *J Microbiol Methods.* 2008;75(2):359-61.
5. Jones, SA., et al. Respiration of *Escherichia coli* in the mouse intestine. *Infection and immunity.* 2007;75(10):4891-9.
6. Chen, YM, Lin, EC. Regulation of the *adhE* gene, which encodes ethanol dehydrogenase in *Escherichia coli*. *J Bacteriol.* 1991;173(24):8009-13..
7. Uden, G., et al. Control of FNR Function of *Escherichia coli* by O<sub>2</sub> and Reducing Conditions. *J Mol Microbiol Biotechnol.* 2002;4(3):263-8.
8. Garriga, X., et al. *nrdD* and *nrdG* genes are essential for strict anaerobic growth of *Escherichia coli*. *Biochemical and biophysical research communications.* 1996;229(1):189-92.
9. Golby, P., Davies, S., Kelly, DJ., Guest, JR., Andrews, SC. Identification and Characterization of a Two-Component Sensor-Kinase and Response-Regulator System (*DcuS-DcuR*) Controlling Gene Expression in Response to C<sub>4</sub>-Dicarboxylates in *Escherichia coli*. *J Bacteriol.* 1999 ;181(4):1238-48.
10. Ganesh, I., Ravikumar, S., Lee, SH., Park, SJ., Hong, SH. Engineered fumarate sensing *Escherichia coli* based on novel chimeric two-component system. *Journal of biotechnology.* 2013;168(4):560-6.
11. Janausch, IG., Zientz, E., Tran, QH., Kröger, A., Uden, G. C<sub>4</sub>-dicarboxylate carriers and sensors in bacteria. *Biochimica et Biophysica Acta (BBA) - Bioenergetics.* 2002:39-56.
12. Brenner, S. The genetics of *Caenorhabditis elegans*. *Genetics.* 1974;77(1):71-94.
13. Sato, K., et al. *Caenorhabditis elegans* SNAP-29 is required for organellar integrity of the endomembrane system and general exocytosis in intestinal epithelial cells. *Mol Biol Cell.* 2011;22(14):2579-87.
14. Strockbine, NA.,et al. Two toxin-converting phages from *Escherichia coli* O157:H7 strain 933 encode antigenically distinct toxins with similar biologic activities. *Infection and immunity.* 1986;53(1):135-40.
15. Yu, SL., Ko, KL., Chen, CS., Chang, YC., Syu, WJ. Characterization of the distal tail fiber

locus and determination of the receptor for phage AR1, which specifically infects *Escherichia coli* O157:H7. *J Bacteriol.* 2000;182(21):5962-8.

16. Chou, TC., et al. Enterohaemorrhagic *Escherichia coli* O157:H7 Shiga-like toxin 1 is required for full pathogenicity and activation of the p38 mitogen-activated protein kinase pathway in *Caenorhabditis elegans*. *Cellular microbiology.* 2013;15(1):82-97.

17. Valdivia, RH., Falkow, S. Bacterial genetics by flow cytometry: rapid isolation of *Salmonella typhimurium* acid-inducible promoters by differential fluorescence induction. *Molecular microbiology.* 1996;22(2):367-78.

18. Muniesa, M., Serra-Moreno, R., Acosta, S., Hernalsteens, JP., Jofre, J. Use of the lambda Red recombinase system to produce recombinant prophages carrying antibiotic resistance genes. *BMC Mol Biol.* 2006;7.
